# Supplementary material for: COVID-19 Vaccine Misperceptions in a Community Sample of Adults Aged 18–49 Years in Australia
Source: Int J Environ Res Public Health. 2022 Jun 4;19(11):6883. doi: 10.3390/ijerph19116883 (PMC9180736; doi:10.3390/ijerph19116883)
Supplement: Supplementary file 1 [file ijerph-19-06883-s001.zip › ijerph-1732265-supplementary.pdf]

Table S1: Themes identified in free text responses to question “In the last week have you come across any content discouraging people from vaccinating”? (n=963)

| Code                 | Subcode                        | n (%)      | Example free text response                                                                                                                                                                                                                               |
|----------------------|--------------------------------|------------|----------------------------------------------------------------------------------------------------------------------------------------------------------------------------------------------------------------------------------------------------------|
| Vaccine side effects |                                | 219 (22.7) |                                                                                                                                                                                                                                                          |
|                      | General                        | 90 (9.3)   | “Side effects from the jab”                                                                                                                                                                                                                              |
|                      | Blood clots                    | 32 (3.3)   | “I heard that getting vaccinated can cause rare blood clots & dangerous within some people getting vaccinated so I choose not to at all don't want to risk my life”                                                                                      |
|                      | Fertility & Reproductive       | 24 (2.5)   | “That females have had no cycles since getting the vaccination and worried it may cause fertility issues”                                                                                                                                                |
|                      | Motor, cognitive, neurological | 19 (2.0)   | “I have seen a few videos of people who are experiencing neurological symptoms. I have MS and am too scared to take this risk at this point in time. I fear that not enough research has been done to determine what the long term side effects will be” |
|                      | AstraZeneca specific           | 15 (1.6)   | “Information discouraging AstraZeneca shared on social media platforms”                                                                                                                                                                                  |
|                      | Heart concerns                 | 14 (1.5)   | “People have posted about patients being admitted to the hospital with heart conditions after the vaccine although they were healthy beforehand”                                                                                                         |
|                      | Shaking                        | 9 (0.9)    | “I witnessed videos of people experiencing shaking after getting the vaccine.”                                                                                                                                                                           |
|                      | Paralysis                      | 5 (0.5)    | “That the vaccine has caused anaphylaxis and partial paralysis”                                                                                                                                                                                          |
|                      | Pain                           | 4 (0.4)    | “Feeling unusual thing, paining body, not feeling healthy”                                                                                                                                                                                               |
|                      | Fever                          | 4 (0.4)    | “People having to take time off work after being vaccinated because of the symptoms - bed ridden with chills, fever etc”                                                                                                                                 |

|                                                   |                                       |            |                                                                                                                                                                                                         |
|---------------------------------------------------|---------------------------------------|------------|---------------------------------------------------------------------------------------------------------------------------------------------------------------------------------------------------------|
|                                                   | Fainting                              | 3 (0.3)    | "People collapsing after having the shot"                                                                                                                                                               |
| Vaccine safety/risk                               |                                       | 165 (17.1) |                                                                                                                                                                                                         |
|                                                   | Vaccine safety                        | 52 (5.4)   | "The vaccines are not safe"                                                                                                                                                                             |
|                                                   | Vaccine risk                          | 35 (3.6)   | "Risk of vaccines"                                                                                                                                                                                      |
|                                                   | Death                                 | 78 (8.1)   | "Statistics and cases of the vaccine causing more deaths than the actual virus"                                                                                                                         |
| Conspiracy                                        |                                       | 133 (13.8) |                                                                                                                                                                                                         |
|                                                   | General                               | 58 (6.0)   | "People posting conspiracy theories about the vaccine. Most if it is largely ridiculous."                                                                                                               |
|                                                   | Virus legitimacy                      | 40 (4.2)   | "Covid is a hoax."                                                                                                                                                                                      |
|                                                   | 5G, Tracking, Microchip, Magnetism    | 24 (2.5)   | "Tin foil hat people saying the vaccine is designed to make you more likely to catch a virus which will be released in 2025 as the world governments want to cull the population by 6.5 billion people" |
|                                                   | Vaccine causing disease               | 11 (1.1)   | "Family friend has contracted a disease from one of the vaccines, and has spend most of the last few weeks in and out of hospital."                                                                     |
| Antivax/negative or hesitant views about vaccines |                                       | 115 (11.9) |                                                                                                                                                                                                         |
|                                                   | Antivax/negative views about vaccines | 109 (11.3) | "Many people within my community are strongly against the vaccine for many well informed and educated reasons"                                                                                          |
|                                                   | Vaccine hesitant                      | 6 (0.6)    | "Some vaccine reluctance amongst colleagues."                                                                                                                                                           |
| None (no codable content)                         |                                       | 81 (8.4)   | "Covid 19 news"                                                                                                                                                                                         |
| Concern about lack of vaccine testing/contents    |                                       | 75 (7.8)   |                                                                                                                                                                                                         |
|                                                   | Inadequate vaccine testing            | 60 (6.2)   | "The immunization has been rushed way to quickly without adequate testing before it was released to the public"                                                                                         |

|                                                         |                                    |          |                                                                                                                                                                                                                                                                                                                        |
|---------------------------------------------------------|------------------------------------|----------|------------------------------------------------------------------------------------------------------------------------------------------------------------------------------------------------------------------------------------------------------------------------------------------------------------------------|
|                                                         | Vaccine ingredients                | 15 (1.6) | "Vaccines carry unnatural biological components"                                                                                                                                                                                                                                                                       |
| Unclear/ Gibberish                                      |                                    | 73 (7.6) | "A lot of different things."                                                                                                                                                                                                                                                                                           |
| Distrust in government                                  |                                    | 64 (6.6) |                                                                                                                                                                                                                                                                                                                        |
|                                                         | Anti-government sentiment          | 33 (3.4) | "Gov't not reporting the cases of adverse effect and death due to Covid-19 Vaccines"                                                                                                                                                                                                                                   |
|                                                         | Government control                 | 31 (3.2) | "The government says the vaccines are safe and effective, while changing the recommendations constantly in response to reports of side affects or covid outbreaks, it doesn't instil trust or a sense that the experts know what they're doing, there need to be more openness, informed consent and less propaganda." |
| Vaccine effectiveness                                   |                                    | 55 (5.7) | "People saying that some others are still being hospitalised from covid-19 even with being fully vaccinated so what is the point in the vaccine if it's not actually doing it's job"                                                                                                                                   |
| Broadcasting about/telling others not to vaccinate      |                                    | 52 (5.4) | "People with a large following on Instagram encouraging people to not get vaccinated"                                                                                                                                                                                                                                  |
| Protest                                                 |                                    | 50 (5.2) | "protests in Sydney and supporting debate on social media"                                                                                                                                                                                                                                                             |
| Uncertainty/unknowns about long term effects of vaccine |                                    | 39 (4.0) |                                                                                                                                                                                                                                                                                                                        |
|                                                         | Uncertainty/unknowns about vaccine | 15 (1.6) | "Friends and family sharing article's about the uncertainty of the vaccines"                                                                                                                                                                                                                                           |
|                                                         | Long term effects                  | 24 (2.5) | "Not sufficient knowledge about long term effects of Covid vaccines"                                                                                                                                                                                                                                                   |
| Illness post-vaccine                                    |                                    | 30 (3.1) | "Two people I know who have had the vaccines were unwell for weeks/This friend went into the ICU after getting the vaccine, he nearly died..."                                                                                                                                                                         |

|                                         |                                                 |          |                                                                                                                                                                                                                             |
|-----------------------------------------|-------------------------------------------------|----------|-----------------------------------------------------------------------------------------------------------------------------------------------------------------------------------------------------------------------------|
| Personal choice/loss of rights/mandates |                                                 | 31 (3.2) | "Being forced to do this is against our constitutional right and is illegal"                                                                                                                                                |
| Misinformation                          |                                                 | 26 (2.7) |                                                                                                                                                                                                                             |
|                                         | Misinformation                                  | 15 (1.6) | "Mainly idiots in Facebook community groups spreading misinformation. I try to avoid reading any news on COVID and prefer to search for research papers to see what science says and not Karen and Bruce from regional VIC" |
|                                         | Questionable/Alternative evidence about vaccine | 11 (1.1) | "People spreading false information in regards to the vaccines on their own social media"                                                                                                                                   |
| Vaccine roll-out concerns               |                                                 | 14 (1.5) | "The waiting time to be fully vaccinated by Astra could be up to 3 months/ 12 weeks, by that time Pfizer would have rolled out."                                                                                            |
| Natural immunity/vaccine not needed     |                                                 | 15 (1.6) |                                                                                                                                                                                                                             |
|                                         | Vaccine not needed                              | 12 (1.2) | "People who have respiratory issues or immune deficiencies should get it but for everyone else who is healthy they don't really need it"                                                                                    |
|                                         | Natural immunity                                | 3 (3.03) | "natural healing is better"                                                                                                                                                                                                 |
| Distrust in vaccine companies           |                                                 | 11 (1.1) | "Not to trust the companies behind the vaccines, they are in it purely for profit nothing else"                                                                                                                             |
| Fear mongering and hate speech          |                                                 | 10 (1.0) |                                                                                                                                                                                                                             |
|                                         | Fear mongering                                  | 9 (0.9)  | "People fear mongering and spreading it to others"                                                                                                                                                                          |
|                                         | Hate speech                                     | 1 (0.1)  | "Protests, tweets, hate speech"                                                                                                                                                                                             |
| Media manipulation                      |                                                 | 4 (0.4)  | "Fabricated media or non peer reviewed articles"                                                                                                                                                                            |
| Health professional suppression         |                                                 | 2 (0.2)  | "Deaths caused by covid vaccinations. Political gagging of health professionals. Information manipulation by government and media."                                                                                         |

|                                |  |         |                                                                                                 |
|--------------------------------|--|---------|-------------------------------------------------------------------------------------------------|
| Dismissal of adverse reactions |  | 2 (0.2) | "People talking about their experiences of severe reactions that are being swept under the rug" |
|--------------------------------|--|---------|-------------------------------------------------------------------------------------------------|

Table S2: Sources identified in free text responses to question “In the last week have you come across any content discouraging people from vaccinating”? (n=963)

| Source code                                                   | Subcode   | n (%)         | Example free text response                                                                                                                                                                                                   |
|---------------------------------------------------------------|-----------|---------------|------------------------------------------------------------------------------------------------------------------------------------------------------------------------------------------------------------------------------|
| Social media                                                  |           | 182<br>(18.9) |                                                                                                                                                                                                                              |
|                                                               | General   | 81<br>(8.4)   | “Anti Vax articles on social media”                                                                                                                                                                                          |
|                                                               | Facebook  | 68<br>(7.1)   | “Any vaccination videos on Facebook listing negative side effects”                                                                                                                                                           |
|                                                               | Instagram | 17<br>(1.8)   | “Instagram posts shared by friends listing views of non vax posts”                                                                                                                                                           |
|                                                               | TikTok    | 9 (0.9)       | “People talking about the dangers of the vaccine on TikTok”                                                                                                                                                                  |
|                                                               | Youtube   | 4 (0.4)       | “YouTube on Questioning the Effectiveness of Vaccine”                                                                                                                                                                        |
|                                                               | Twitter   | 2 (0.2)       | “People on Facebook and Twitter and Instagram questioning the safety of vaccines”                                                                                                                                            |
|                                                               | Reddit    | 1 (0.1)       | “On Reddit - posts questioning the safety of the vaccines as they were so rushed.”                                                                                                                                           |
| Family/Friends/Colleague                                      |           | 57<br>(5.9)   | “A friend that does not believe he should get vaccinated to keep others safe”                                                                                                                                                |
| Traditional Media (News, TV, Print, Flyers)                   |           | 46<br>(4.8)   | “a headline on the news”                                                                                                                                                                                                     |
| "Video"/"Picture"/"Post"/"Article" but no further information |           | 27<br>(2.8)   | “I witnessed videos of people experiencing shaking after getting the vaccine.”                                                                                                                                               |
| Protest                                                       |           | 21<br>(2.2)   | “People protesting against lockdowns etc”                                                                                                                                                                                    |
| In person/physical public location                            |           | 7 (0.7)       | “A customer came in claiming it was nonsense they’re making us live like this and have to get stabbed with random shit they mixed together (or something along those lines)”                                                 |
| Healthcare worker/scientist                                   |           | 7 (0.7)       | “local chemist stating he would not be getting and would not be giving it to his children, footage of a woman strapped to a bed with a severe reaction to immunisation, lady in Sydney who died after receiving her vaccine” |
| Public figure                                                 |           | 7 (0.7)       | “Pauline Hanson explaining that the vaccines have been developed at such a fast rate, it must have problems with them.”                                                                                                      |
| Community Group                                               |           | 3 (0.3)       | “Many people within my community are strongly against the vaccine for many well informed and educated reasons”                                                                                                               |

Table S3. Correlation matrix for study variables.

|                       | Age      | Gender   | State    | Personal Risk | Australia Risk | Knowledge | Misbeliefs | Conspiracy | General Confidence | Confidence in Govt | Trust in Institutions | Trust in Govt | Education |
|-----------------------|----------|----------|----------|---------------|----------------|-----------|------------|------------|--------------------|--------------------|-----------------------|---------------|-----------|
| Age                   | 1        |          |          |               |                |           |            |            |                    |                    |                       |               |           |
| Gender                | 0.0276   | 1        |          |               |                |           |            |            |                    |                    |                       |               |           |
| State                 | 0.0523*  | -0.0813* | 1        |               |                |           |            |            |                    |                    |                       |               |           |
| Personal Risk         | 0.0168   | -0.0305  | -0.0982* | 1             |                |           |            |            |                    |                    |                       |               |           |
| Australia Risk        | 0.0371   | 0.0174   | -0.1616* | 0.5145*       | 1              |           |            |            |                    |                    |                       |               |           |
| Knowledge             | -0.0628* | -0.0189  | 0.0094   | 0.2740*       | 0.0961*        | 1         |            |            |                    |                    |                       |               |           |
| Misbeliefs            | 0.0615*  | 0.0454*  | -0.0125  | -0.3339*      | -0.1362*       | -0.5835*  | 1          |            |                    |                    |                       |               |           |
| Conspiracy            | 0.0727*  | 0.1009*  | -0.0166  | -0.3062*      | -0.0787*       | -0.6001*  | 0.6564*    | 1          |                    |                    |                       |               |           |
| General Confidence    | -0.0444* | -0.0136  | -0.1290* | 0.5012*       | 0.4875*        | 0.3882*   | -0.4609*   | -0.3743*   | 1                  |                    |                       |               |           |
| Confidence in Govt    | -0.1111* | 0.0131   | -0.0448* | 0.3422*       | 0.2567*        | 0.3225*   | -0.4253*   | -0.3393*   | 0.538*             | 1                  |                       |               |           |
| Trust in Institutions | -0.1136* | -0.0034  | -0.0298  | 0.4052*       | 0.2533*        | 0.5277*   | -0.6153*   | -0.582*    | 0.6026*            | 0.5657*            | 1                     |               |           |
| Trust in Govt         | -0.1048* | 0.0125   | -0.018   | 0.3323*       | 0.2539*        | 0.3452*   | -0.4036*   | -0.3556*   | 0.5395*            | 0.6191*            | 0.6959*               | 1             |           |
| Education             | 0.1325*  | 0.0710*  | -0.0803* | 0.0900*       | 0.1269*        | 0.0952*   | -0.1339*   | -0.0513*   | 0.1599*            | 0.1382*            | 0.1533*               | 0.1210*       | 1         |
